# Supplementary material
Source: ML conference proceedings conference paper supplement (https://openreview.net/forum?id=p8gTWkFIvx)
Supplement: supplementary_material [file attachment]

---

# Supplementary Materials:

## Modality-Independent Teachers Meet

## Weakly-Supervised Audio-Visual Event Parser

---

Anonymous Author(s)

Affiliation

Address

email

### 1 A Caption Construction and Threshold Determination in VALOR

2 We provide detailed explanations on how we devise input captions for each event to be used with  
3 CLIP and CLAP. For the CLIP’s input captions, we add the prompt "A photo of" before each event  
4 name and modify some of the captions to make them sound reasonable, *e.g.* changing "A photo  
5 of speech" to "A photo of people talking." As for CLAP, we add the prompt "This is a sound of"  
6 before each event name. All input captions devised for CLAP and CLIP are included in Table 1 for  
7 reference.

8 Furthermore, the determination of class-dependent threshold values,  $\theta^{\text{CLIP}}$  for CLIP and  $\theta^{\text{CLAP}}$  for  
9 CLAP, is based on the visual and audio segment-level F-score, respectively. This score is achieved by  
10 comparing the segment-level pseudo labels generated by the respective models against the ground  
11 truth labels.

Table 1: **The List of Input Captions and Thresholds for CLIP and CLAP.** We add the prompt “A photo of” before each event name to make CLIP’s input captions and the prompt “This is a sound of” to make CLAP’s input captions.

| Events                 | Input Captions                        |                                           | thresholds $\theta$    |                        |
|------------------------|---------------------------------------|-------------------------------------------|------------------------|------------------------|
|                        | CLIP                                  | CLAP                                      | $\theta^{\text{CLIP}}$ | $\theta^{\text{CLAP}}$ |
| Speech                 | A photo of people talking.            | This is a sound of speech                 | 20                     | 0                      |
| Car                    | A photo of a car.                     | This is a sound of car                    | 15                     | 0                      |
| Cheering               | A photo of people cheering.           | This is a sound of cheering               | 18                     | 1                      |
| Dog                    | A photo of a dog.                     | This is a sound of dog                    | 14                     | 4                      |
| Cat                    | A photo of a cat.                     | This is a sound of cat                    | 15                     | 6                      |
| Frying_(food)          | A photo of frying food.               | This is a sound of frying (food)          | 18                     | -2                     |
| Basketball_bounce      | A photo of people playing basketball. | This is a sound of basketball bounce      | 18                     | 4                      |
| Fire_alarm             | A photo of a fire alarm.              | This is a sound of fire alarm             | 15                     | 4                      |
| Chainsaw               | A photo of a chainsaw.                | This is a sound of chainsaw               | 15                     | 2                      |
| Cello                  | A photo of a cello.                   | This is a sound of cello                  | 15                     | 2                      |
| Banjo                  | A photo of a banjo.                   | This is a sound of banjo                  | 15                     | 2                      |
| Singing                | A photo of people singing.            | This is a sound of singing                | 18                     | 1                      |
| Chicken_rooster        | A photo of a chicken or a rooster.    | This is a sound of chicken, rooster       | 15                     | 2                      |
| Violin_fiddle          | A photo of a violin.                  | This is a sound of violin fiddle          | 15                     | 3                      |
| Vacuum_cleaner         | A photo of a vacuum cleaner.          | This is a sound of vacuum cleaner         | 15                     | 0                      |
| Baby_laughter          | A photo of a laughing baby.           | This is a sound of baby laughter          | 15                     | 2                      |
| Accordion              | A photo of an accordion.              | This is a sound of accordion              | 15                     | 2                      |
| Lawn_mower             | A photo of a lawnmower.               | This is a sound of lawn mower             | 15                     | 2                      |
| Motorcycle             | A photo of a motorcycle.              | This is a sound of motorcycle             | 15                     | 0                      |
| Helicopter             | A photo of a helicopter.              | This is a sound of helicopter             | 16                     | 2                      |
| Acoustic_guitar        | A photo of a acoustic guitar.         | This is a sound of acoustic guitar        | 14                     | -1                     |
| Telephone_bell_ringing | A photo of a ringing telephone.       | This is a sound of telephone bell ringing | 15                     | 2                      |
| Baby_cry_infant_cry    | A photo of a crying baby.             | This is a sound of baby cry, infant cry   | 15                     | 3                      |
| Blender                | A photo of a blender.                 | This is a sound of blender                | 15                     | 3                      |
| Clapping               | A photo of hands clapping.            | This is a sound of clapping               | 18                     | 0                      |

## 12 B More AVVP Implementation Details

13 In our experiments, we apply two different model architectures: 1) the standard model architecture,  
 14 which is employed in VALOR, consists of a single HAN layer with a hidden dimension of = 512;  
 15 2) the variant model architecture, which is used in VALOR+ and VALOR++, is a thinner yet deeper  
 16 HAN model, comprising four HAN layers with a hidden dimension of = 256. Both models contain  
 17 approximately the same number of trainable parameters. The above details are summarized in Table 2  
 18 below. The models are trained using the AdamW optimizer, configured with  $\beta_1 = 0.5$ ,  $\beta_2 = 0.999$ ,  
 19 and weight decay set to 0.001. We employ a learning rate scheduling approach that initiates with a  
 20 linear warm-up phase over 10 epochs, rises to the peak learning rate, and then decays according to a  
 21 cosine annealing schedule to the minimum learning rate. We set the batch size to 64 and train for 60  
 22 epochs in total. We clip the gradient norm at 1.0 during training. We attach the code containing our  
 23 model and loss functions to the supplementary files.

Table 2: **Two Different HAN Model Architectures.** The “standard” model architecture is used in VALOR. The “variant” model architecture is used in VALOR+ and VALOR++.

| HAN model                    | standard | variant |
|------------------------------|----------|---------|
| Model Arch. Hyper-parameters |          |         |
| hidden dim                   | 512      | 256     |
| hidden layers                | 1        | 4       |
| trainable params             | 5.1M     | 5.05M   |
| Training Hyper-parameters    |          |         |
| peak learning rate           | 1e-4     | 3e-4    |
| min learning rate            | 1e-6     | 3e-6    |

## 24 C Additional Analysis: The Fidelity of Our Segment-level Labels

25 To examine the fidelity of our generated segment-level pseudo labels in both modalities, we compare  
 26 our labels,  $\hat{y}_t^a$  and  $\hat{y}_t^v$ , with naive segment-level labels, which are obtained by copying the video-level  
 27 label  $y$  of a video and assigning it to all segments. In other words, we assume that an event occurs in  
 28 both modalities and all segments if it occurs in the video. As depicted in Table 3, the segment-level  
 29 F-scores of our generated segment-level audio and visual pseudo labels are superior to those of the  
 30 respective naive ones. Notably, our segment-level visual F-score is 10 points higher than the naive  
 31 one. Moreover, we evaluate the fidelity of the audio-visual event labels by performing element-wise  
 32 AND operation on the segment-level audio and visual labels. The segment-level F-score of our  
 33 audio-visual labels significantly surpasses that of the naive ones. These findings present the reliability  
 34 of our segment-level pseudo labels, which can provide more accurate segment-level information to  
 35 facilitate model training.

Table 3: **The Fidelity of Our Segment-level Labels.** We compare the segment-level labels generated from our method with the naive segment-level labels directly copied from the video-level labels, where we assume the events occurring in a video will occur in both modalities and every segment. We can see that the segment-level labels generated by our method VALOR are more accurate than the naive segment-level labels.

| Methods                        | Audio         | Visual         | Audio-Visual   |
|--------------------------------|---------------|----------------|----------------|
| video labels as segment labels | 79.33         | 69.30          | 60.69          |
| VALOR-generated segment labels | 84.92 (+5.59) | 82.80 (+13.50) | 76.37 (+15.68) |

## 36 D VALOR with Pseudo Label Denoising

37 In this section, we explore the application of Pseudo Label Denoising (PLD), as proposed in  
 38 VPLAN [5], to refine the segment-level labels generated by our method. The hyperparameters  
 39 for the PLD, specifically  $K = 4$  and  $\alpha = 6$  for the visual modality, and  $K = 10$  and  $\alpha = 10$  for  
 40 the audio modality, are chosen based on the visual and audio F-scores on the validation split. From

Table 4, we can see that PLD is less effective in refining our pseudo labels compared to VPLAN’s pseudo labels (+1.5 v.s. +2.22 in segment-level metrics and +2.28 v.s. +3.41 in event-level metrics). However, it’s worth noting the visual segment-level labels derived from our method **before** PLD are nearly as accurate as those from VPLAN **after** PLD (72.34 v.s. 72.51). Although we do implement PLD in the audio modality, no noticeable improvement is recorded for any audio pseudo labels. Referring to Table 5, the model trained with our denoised segment-level labels improves marginally. Nevertheless, we outperform VPLAN on Type@AV and Event@AV F-scores in segment-level and event-level metrics.

Table 4: **PLD refinement.** We evaluate the fidelity (F-score) of the segment-level pseudo labels before and after pseudo label denoising (PLD). PLD is less effective in refining our pseudo labels compared to VPLAN’s pseudo labels. However, the visual segment-level labels generated from our method **before** PLD are nearly as accurate as those generated from VPLAN **after** PLD (72.34 v.s. 72.51). Results are reported on the validation split.

| Methods   | PLD | Audio |       | Visual        |               |
|-----------|-----|-------|-------|---------------|---------------|
|           |     | Seg   | Event | Seg           | Event         |
| VALOR     | ✗   | 80.78 | 71.69 | 72.34         | 66.36         |
| VALOR     | ✓   | 80.78 | 71.69 | 73.84 (+1.5)  | 68.64 (+2.28) |
| VPLAN [5] | ✗   | -     | -     | 70.29         | 64.68         |
| VPLAN [5] | ✓   | -     | -     | 72.51 (+2.22) | 68.09 (+3.41) |

Table 5: **Results of Training with Denoised Labels.** We outperform VPLAN on Type@AV and Event@AV F-scores in segment-level and event-level metrics with and without PLD. Results are reported on the testing split.

| Methods   | PLD | Segment-level |       | Event-level |       |
|-----------|-----|---------------|-------|-------------|-------|
|           |     | Type          | Event | Type        | Event |
| VALOR     | ✗   | 62.0          | 61.5  | 56.7        | 54.2  |
| VALOR     | ✓   | 62.2          | 61.9  | 56.6        | 53.7  |
| VPLAN [5] | ✗   | 61.2          | 59.4  | 54.7        | 50.8  |
| VPLAN [5] | ✓   | 62.0          | 60.1  | 55.6        | 51.3  |

## E Qualitative Comparison with Previous AVVP Works

Aside from quantitative comparison with previous AVVP works, we perform a qualitative evaluation as well. In Figure 1, we qualitatively compare with the baseline method HAN [4] and the state-of-the-art method JoMoLD [1]. In the top video example, JoMoLD erroneously predicts a “Speech” audio event, while all other methods accurately identify the audio events. In the bottom example, HAN produces identical temporal annotations for the “Speech” event in both modalities, despite the event only occurring audibly. Additionally, our method provides annotations that more closely align with the ground truth than either HAN or JoMoLD when the events occur intermittently, which is a challenging task for models to generate accurate predictions.

## F More Audio-Visual Event Localization Details

**Baseline Method** We adopt the baseline model HAN to aggregate unimodal and cross-modal temporal information as we have done in the AVVP task. For brevity, we introduce our baseline method from the procedure after feature aggregation. The segment-level audio features and visual features,  $\hat{f}_t^a$  and  $\hat{f}_t^v$  ( $\in \mathbb{R}^d$ ), output from HAN are processed through a 2-layer feed-forward network (FFN) to yield the unimodal segment-level predictions (logits),  $z_t^a$  and  $z_t^v$  ( $\in \mathbb{R}^{(C+1)}$ ), respectively:

$$z_t^m = \text{FFN}(\hat{f}_t^m), m \in \{a, v\}, \quad (1)$$

where  $C + 1$  denotes the number of event classes and the “background” event. Since segment-level labels are not available in the weakly-supervised setting, we simply infer video-level logits

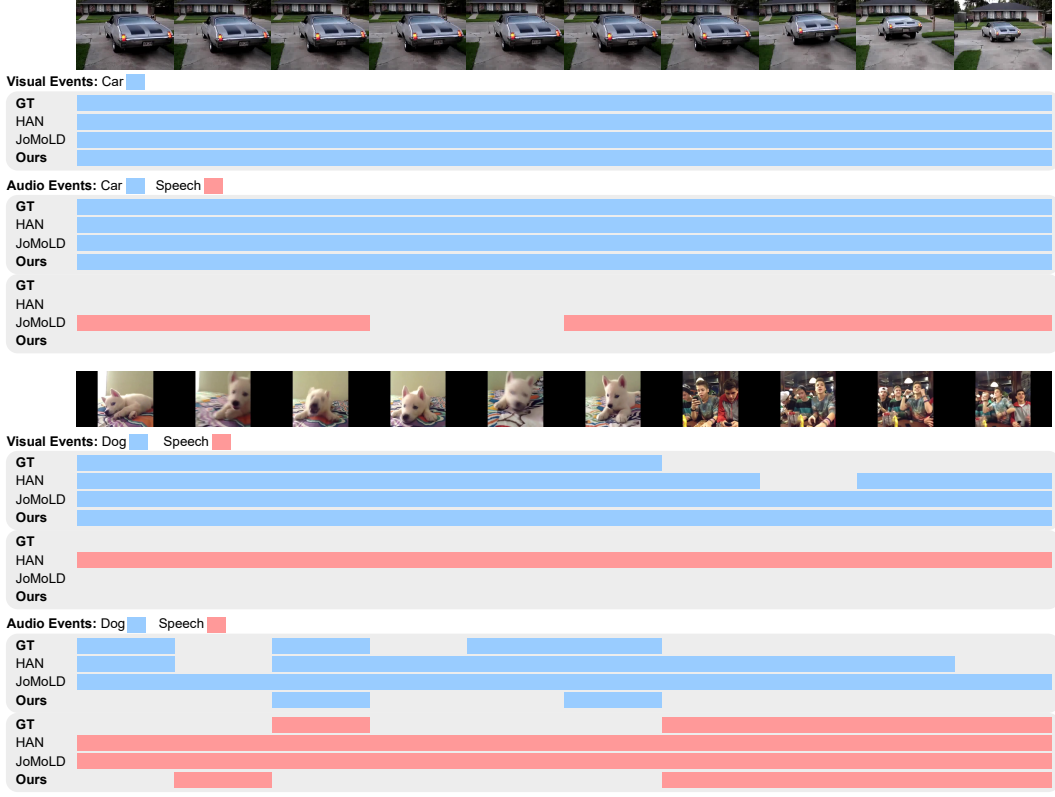

Figure 1: **Qualitative Comparison with Previous AVVP Works.** "GT" denotes the ground truth annotations. We compare with HAN [4] and JoMoLD [1]. In general, the predictions generated by our method VALOR are more accurate than those produced by the other methods.

66  $z \in \mathbb{R}^{C+1}$  by averaging all logits over time dimension  $t$  and modality dimension  $m$ . Finally, the  
67 binary cross-entropy loss is applied to train the model:

$$\mathcal{L}_{\text{video}}^{\text{ave}} = \text{BCE}(\text{Sigmoid}(z), y), \quad z = \frac{1}{2T} \sum_t \sum_m z_t^m \quad (2)$$

68 **Harvesting Training Signals** The main idea of our method is to leverage large-scale open-  
69 vocabulary pre-trained models to provide modality-specific segment-level pseudo labels. We elaborate  
70 on how these pseudo labels are generated. Initially, segment-level audio logits and visual logits,  
71  $z_t^{\text{CLAP}}$  and  $z_t^{\text{CLIP}}$  ( $\in \mathbb{R}^C$ ), are generated in a manner identical to the AVVP task. Then, we use two sets  
72 of class-dependent thresholds,  $\phi^{\text{CLAP}}$  and  $\phi^{\text{CLIP}}$  ( $\in \mathbb{R}^C$ ), to construct the uni-modal segment-level  
73 labels  $\hat{y}_t^a$  and  $\hat{y}_t^v$  ( $\in \mathbb{R}^C$ ), respectively:

$$\hat{y}_t^m = y \wedge \{z_t^P > \phi^P\}, \quad (m, P) \in \{(v, \text{CLIP}), (a, \text{CLAP})\} \quad (3)$$

74 In addition, we append an additional event "background" to the end of the segment-level labels  $\hat{y}_t^v$   
75 to expand the dimension to  $\mathbb{R}^{C+1}$ . If  $\hat{y}_t^m$  consists solely of zeros, we assign the last dimension  
76 ("background") a value of one; otherwise, we assign it a value of zero. In other words, if an event  
77 could possibly occur in a video and the pre-trained model has a certain confidence that the event is  
78 present in a specific video segment, that segment will be labeled as containing the event; otherwise,  
79 the segment will be labeled as "background". Having prepared the segment-level pseudo labels  $\hat{y}_t^a$   
80 and  $\hat{y}_t^v$ , we compute binary cross-entropy loss in individual modality and combine them to optimize  
81 the whole model instead of using the video-level loss  $\mathcal{L}_{\text{video}}^{\text{ave}}$ :

$$\mathcal{L}_{\text{VALOR}}^{\text{ave}} = \text{BCE}(\text{Sigmoid}(z_t^a), \hat{y}_t^a) + \text{BCE}(\text{Sigmoid}(z_t^v), \hat{y}_t^v) \quad (4)$$

82 **Dataset & Evaluation Metrics** The *Audio-Visual Event (AVE) Dataset* [3] is composed of 4143  
83 10-second video clips from AudioSet [2] that cover 28 real-world event categories, such as human

84 activities, musical instruments, vehicles, and animals. Each clip contains an event and is uniformly  
 85 split into ten segments. Each segment is annotated with an event category if the event can be detected  
 86 through both visual and auditory cues; otherwise, the segment is labeled as background. However, we  
 87 only use video-level labels indicating which event occurs in the video during training. We follow [3]  
 88 to split the AVE dataset into training, validation, and testing split and report the results on the  
 89 testing split. Following the previous work [3], we use the accuracy of segment-level event category  
 90 predictions as the evaluation metric.

91 **Implementation Details** The pre-trained large ViT-based CLIP and R(2+1)D are used to extract  
 92 2D and 3D visual features, respectively, which are then concatenated to represent low-level visual  
 93 features. The pre-trained HTSAT-RoBERTa fusion-based CLAP is used to extract audio features. We  
 94 adopt the standard HAN model (1-layer and 512-dim) in this task. AdamW optimizer with  $\beta_1 = 0.5$ ,  
 95  $\beta_2 = 0.999$ , and weight decay  $= 1e - 3$  is used to train the model. A learning rate scheduling of  
 96 linear warm-up for 10 epochs to the peak learning rate of  $3e - 4$  and cosine annealing decay to the  
 97 minimum learning rate of  $3e - 6$  is adopted. The batch size and the number of total training epochs  
 98 are 16 and 120, respectively. We clip the gradient norm at 1.0 during training.

## 99 References

- 100 [1] Haoyue Cheng, Zhaoyang Liu, Hang Zhou, Chen Qian, Wayne Wu, and Limin Wang. Joint-modal label  
 101 denoising for weakly-supervised audio-visual video parsing. In *ECCV*, 2022. 3, 4
- 102 [2] Jort F Gemmeke, Daniel PW Ellis, Dylan Freedman, Aren Jansen, Wade Lawrence, R Channing Moore,  
 103 Manoj Plakal, and Marvin Ritter. Audio set: An ontology and human-labeled dataset for audio events. In  
 104 *ICASSP*, 2017. 4
- 105 [3] Yapeng Tian, Jing Shi, Bochen Li, Zhiyao Duan, and Chenliang Xu. Audio-visual event localization in  
 106 unconstrained videos. In *ECCV*, 2018. 4, 5
- 107 [4] Yapeng Tian, Dingzeyu Li, and Chenliang Xu. Unified multisensory perception: Weakly-supervised  
 108 audio-visual video parsing. In *ECCV*, 2020. 3, 4
- 109 [5] Jinxing Zhou, Dan Guo, Yiran Zhong, and Meng Wang. Improving audio-visual video parsing with pseudo  
 110 visual labels. *arXiv preprint arXiv:2303.02344*, 2023. 2, 3
